# Supplementary material for: Air Pollution Monitoring Design for Epidemiological Application in a Densely Populated City
Source: MDPI journal article supplement (doi:10.3390/ijerph14070686), 2017-06-25

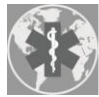

# Air Pollution Monitoring Design for Epidemiological Application in a Densely Populated City

Kyung-Duk Min, Ho-Jang Kwon, KyooSang Kim and Sun-Young Kim

## Supplementary Materials

**Table S1.** List of geographic variables in eight categories with their data sources and types of data.

| Category <sup>a</sup>       | Variable                                                                                                                                                              | Source  | Type of data (data format)                |
|-----------------------------|-----------------------------------------------------------------------------------------------------------------------------------------------------------------------|---------|-------------------------------------------|
| Traffic                     | Distance to the nearest roads (all roads, highway, and MR)                                                                                                            | KTDB    | Road network (line)                       |
|                             | Sum of road lengths (all roads, highway, and MR) <sup>b</sup>                                                                                                         |         |                                           |
|                             | Number of registered vehicles                                                                                                                                         | KOSIS   | Vehicle registration (attributable table) |
| Demographic characteristics | Number of people                                                                                                                                                      | SGIS    | Census (attributable table)               |
|                             | Number of households                                                                                                                                                  |         |                                           |
|                             | Numbers of housing buildings by a type of residence and by a constructed year                                                                                         |         |                                           |
|                             | Numbers of companies and employees by a type of business                                                                                                              |         |                                           |
| Land use                    | Proportions of residential, industrial, commercial, cultural, transportation, public facility, agricultural, forest, grassland, wetland, bare ground, and water areas | EGIS    | Land cover map (polygon)                  |
| Transportation facilities   | Distances to the nearest railroad and subway station                                                                                                                  | SGIS    | Railroad and subway stations (point)      |
|                             | Distance to the nearest bus stop                                                                                                                                      | Biz-GIS | Bus stop (point)                          |
|                             | Distance to the nearest air port                                                                                                                                      | ODP     | Airport (table)                           |
|                             | Distance to the nearest major port                                                                                                                                    | SP-IDC  | Port (table)                              |
| Physical geography          | Distance to river                                                                                                                                                     | SGIS    | River (polygon)                           |
|                             | Distance to coastline                                                                                                                                                 | NSIC    | Coastline (line)                          |
|                             | Distance to the military demarcation line                                                                                                                             | SGIS    | Administrative boundary (polygon)         |
| Emissions                   | Proportions of major pollutants (CO, NO <sub>x</sub> , SO <sub>x</sub> , TSP, PM <sub>10</sub> , VOC, and NH <sub>3</sub> )                                           | NIER    | Emission estimates (attributable table)   |
| Vegetation                  | Annual summary (average, minimum, and maximum) of NDVI                                                                                                                | IIS     | Satellite image (raster)                  |
|                             | Median value in August for previous, current and following years                                                                                                      |         |                                           |
| Altitude                    | Absolute elevation                                                                                                                                                    | USGS    | Digital Elevation Data (raster)           |
|                             | Proportion of concentric elevation points above or below 20 or 50 m                                                                                                   |         |                                           |

Abbreviation: MR, major road; TSP, total suspended particle; CO, carbon monoxide; NO<sub>x</sub>, nitrogen oxides; SO<sub>x</sub>, sulfur oxides; NH<sub>3</sub>, ammonia; VOC, volatile organic compounds; NDVI, Normalized Difference Vegetation Index; KTDB, Korean Transport Database; KOSIS, Korean Statistical Information Service; SGIS, Statistical Geographic Information Service; EGIS, Environmental Geographical Information Service; ODP, open data portal; SP-IDC, Shipping and Port Integrating Data Center; NSIC, National Spatial Information Clearinghouse; NIER, National Institute of Environmental Research; IIS, Institute of Industrial Science, University of Tokyo; USGS, United States Geological Survey. <sup>a</sup>Different

buffer sizes by category: traffic, 25, 50, 100, 300, 500, and 1000 m; demographic characteristics and land use, 50, 100, 300, 500, 1000, and 5000 m; emissions, 3, 15, and 30 km. <sup>b</sup>Sum of road lengths computed for three methods: single central lines of roads, road lines multiplied by numbers of lanes, and road lines multiplied by numbers of lanes and line widths.

**Table S2.** Summary statistics of annual average concentrations for PM<sub>2.5</sub> (µg/m<sup>3</sup>) in 2010 at 37 regulatory monitoring sites in Seoul, Korea.

|                        | N  | Min  | Median | Max  | Mean | SD  |
|------------------------|----|------|--------|------|------|-----|
| Urban background sites | 25 | 19.8 | 25.1   | 27.4 | 24.9 | 1.8 |
| Urban roadside sites   | 12 | 25.4 | 30.3   | 37.0 | 30.6 | 3.8 |
| Total                  | 37 | 19.8 | 25.8   | 37.0 | 26.8 | 3.7 |

**Table S3.** Means and standard deviations of the five selected geographic variables from land use regression of PM<sub>2.5</sub> annual average concentrations during 2010 across current, subject and candidate locations in Seoul, Korea.

| Geographic variables                        | Current (N = 37) <sup>a</sup> | Subject (31,097) <sup>b</sup> | Candidate (412) <sup>c</sup> |
|---------------------------------------------|-------------------------------|-------------------------------|------------------------------|
| Length of major road * (100m buffer)        | 112.47 ± 165.67               | 23.57 ± 71.98                 | 44.92 ± 99.36                |
| Proportion of water surface land use (500m) | 0.02 ± 0.06                   | 0.01 ± 0.03                   | 0.01 ± 0.03                  |
| Number of construction companies (1000m)    | 71.15 ± 85.88                 | 48.00 ± 62.64                 | 54.94 ± 68.94                |
| Distance to the nearest bus stop            | 2.05 ± 0.30                   | 2.11 ± 0.29                   | 1.95 ± 0.35                  |
| Number of construction workers (100m)       | 19.24 ± 31.82                 | 18.83 ± 59.16                 | 32.15 ± 78.99                |

<sup>a</sup> Current location: regulatory monitoring sites. <sup>b</sup> Subject location: home addresses of the Atopy Free School survey children. <sup>c</sup> Candidate location: community service centers. \* Major road defined as all national and metropolitan highways, and local roads with more than six lanes

**Table S4.** Means and standard deviations of the five selected geographic variables from land use regression of NO<sub>2</sub> annual average concentrations during 2010 across current, subject and candidate locations in Seoul, Korea.

| Geographic variables                                          | Current (N = 37) <sup>a</sup> | Subject (31,097) <sup>b</sup> | Candidate (412) <sup>c</sup> |
|---------------------------------------------------------------|-------------------------------|-------------------------------|------------------------------|
| Length of major road multiplied by number of lanes (100m)     | 765.80 ± 1070.68              | 137.45 ± 380.64               | 253.83 ± 512.22              |
| Number of construction (1000m)                                | 3206.12 ± 4176.85             | 2196.45 ± 2883.40             | 2445.74 ± 3424.93            |
| Number of buildings constructed before the 1960s (100m)       | 0.73 ± 1.35                   | 1.06 ± 3.41                   | 1.17 ± 4.29                  |
| Proportion of water surface land use (500m)                   | 0.02 ± 0.06                   | 0.01 ± 0.03                   | 0.01 ± 0.03                  |
| Proportion of for culture, sports and tourism land use (300m) | 0.01 ± 0.03                   | 0.00 ± 0.01                   | 0.00 ± 0.01                  |

<sup>a</sup> Current location: regulatory monitoring sites. <sup>b</sup> Subject location: home addresses of the Atopy Free School survey children. <sup>c</sup> Candidate location: community service centers. \*Major road defined as all national and metropolitan highways, and local roads with more than six lanes.

**Table S5.** Five selected geographic variables and cross-validated R<sup>2</sup>s from land use regression of NO<sub>2</sub> annual average concentrations during 2010 in Seoul, Korea.

| Variable                                                      | β <sup>a</sup> | p value | CV R <sup>2</sup> |
|---------------------------------------------------------------|----------------|---------|-------------------|
| Length of major road multiplied by number of lanes (100m)     | 10.76          | <0.001  | 0.58              |
| Number of employees in construction industries (1000m)        | 8.08           | <0.001  |                   |
| Number of buildings constructed before the 1960s (100m)       | 6.85           | <0.001  |                   |
| Proportion of water surface land use (500m)                   | 1.35           | <0.001  |                   |
| Proportion of for culture, sports and tourism land use (300m) | -1.31          | 0.003   |                   |

<sup>a</sup> Estimated regression coefficient multiplied by an increment (90<sup>th</sup>–10<sup>th</sup> percentile) of each variable. <sup>b</sup> Major road defined as all national and metropolitan highways, and local roads with more than six lanes.

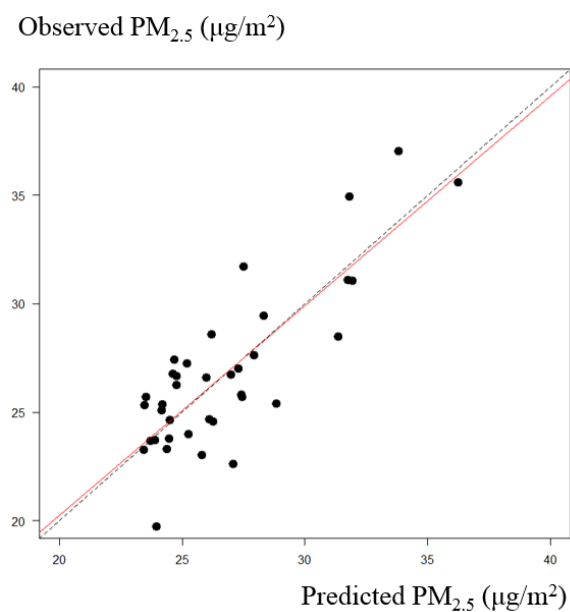

**Figure S1.** Scatter plot of observed and cross-validation predicted annual average concentrations of PM<sub>2.5</sub> across 37 regulatory monitoring sites during 2010 in Seoul, Korea (leave-one-out cross-validation R<sup>2</sup> of 0.69).

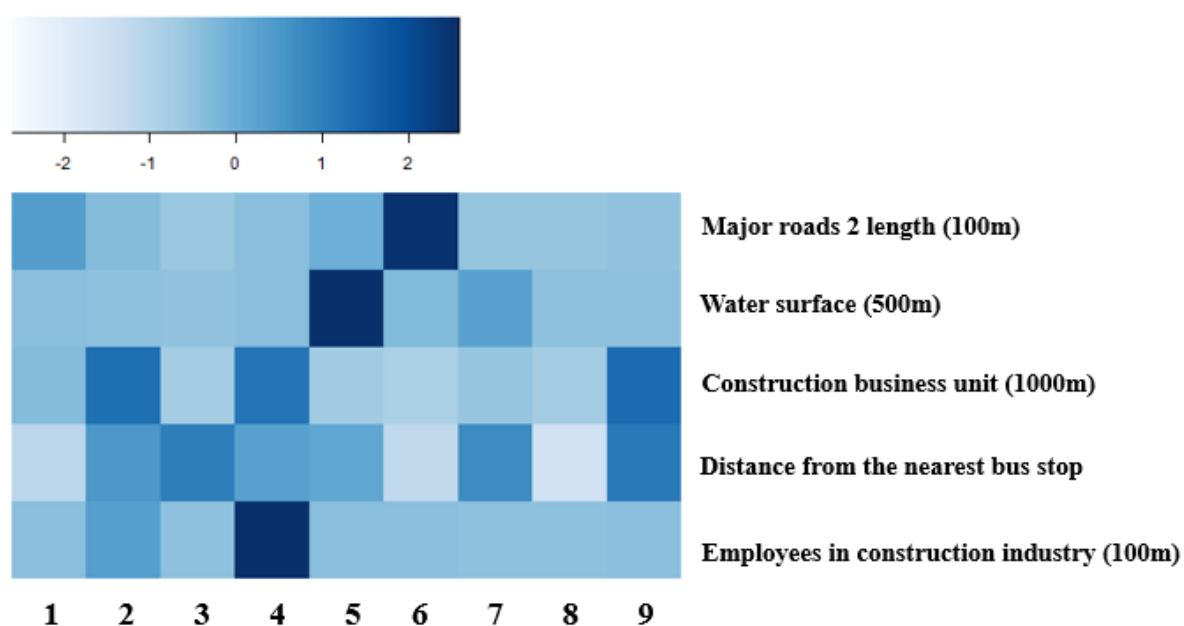

**Figure S2.** Heatmap of the five geographic variables at current, subject, and candidate locations across nine clusters for PM<sub>2.5</sub>.

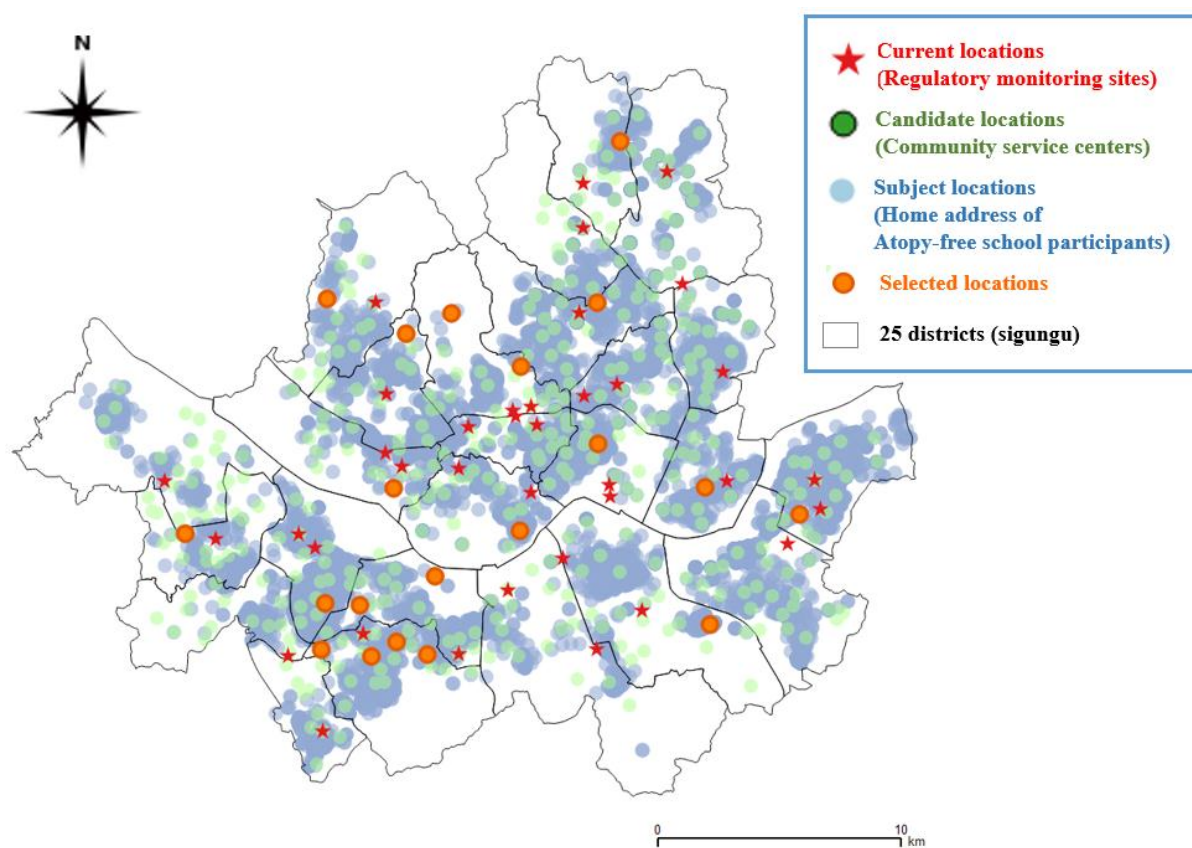

**Figure S3.** Map of 20 selected new monitoring sites for PM<sub>2.5</sub> along with current, candidate, and subject locations in Seoul, Korea.

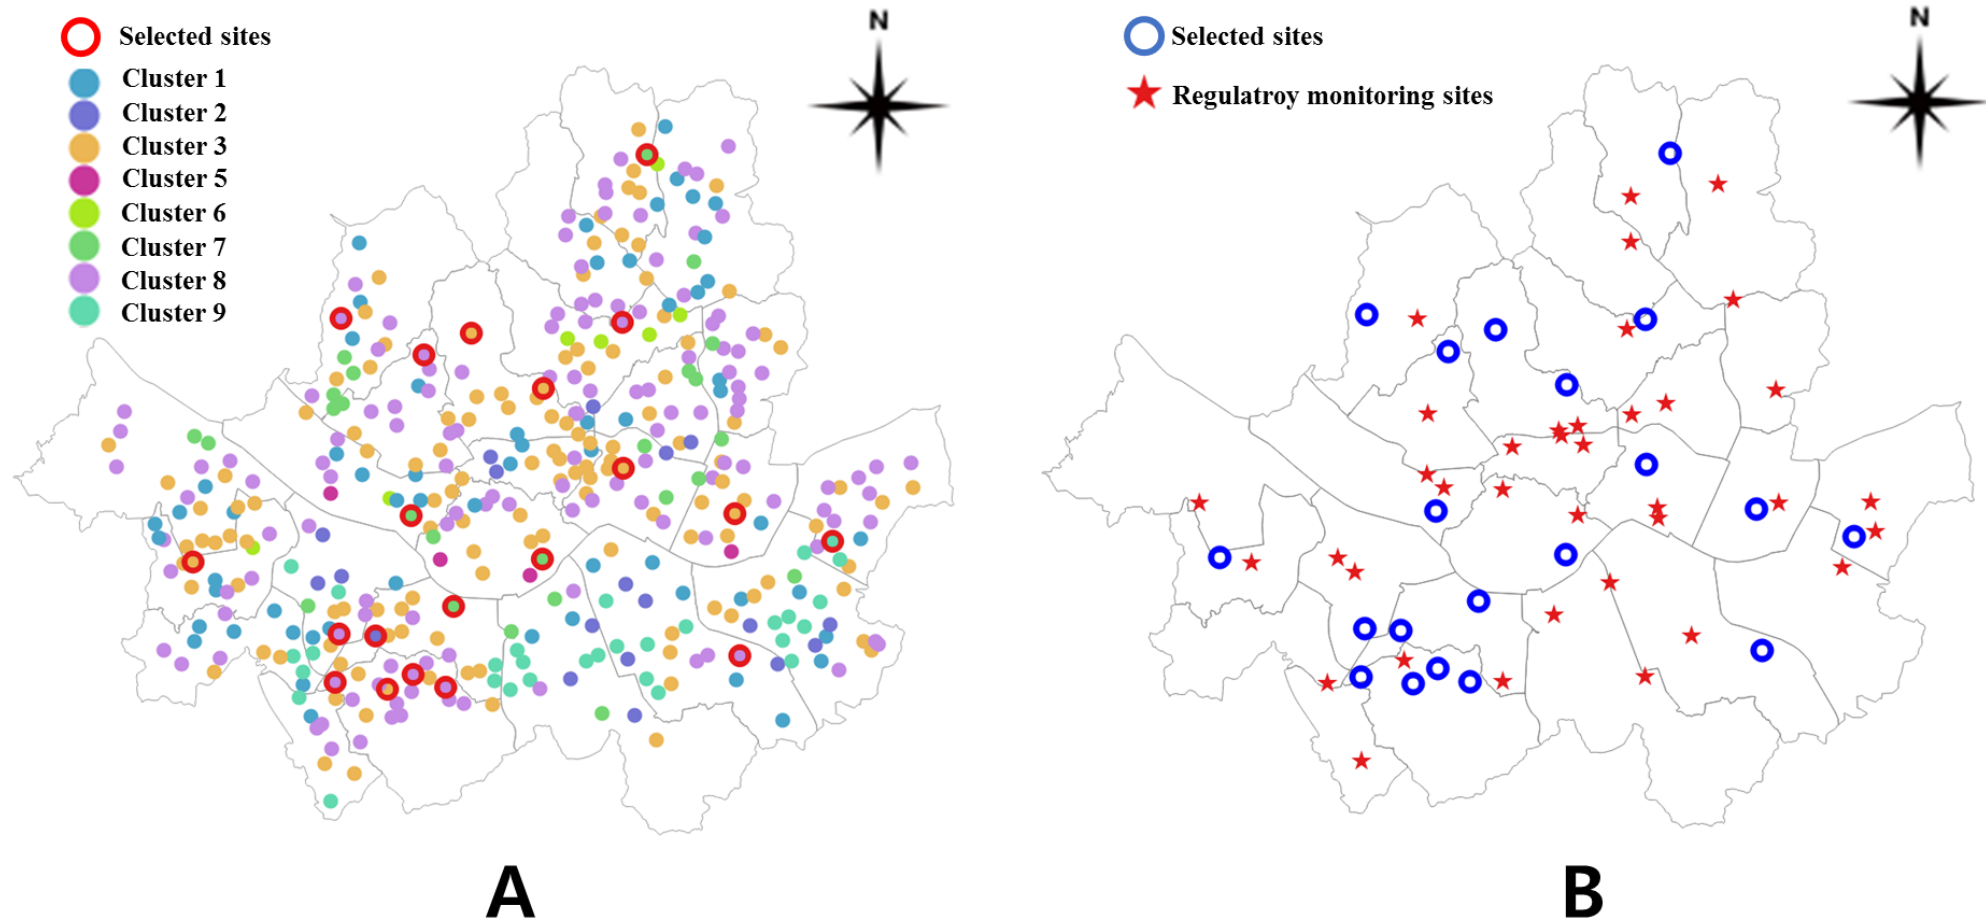

**Figure S4.** Maps of candidate sites in each of the nine clusters determined from cluster analysis for PM<sub>2.5</sub> (A) and new selected sites with regulatory monitoring sites (B).

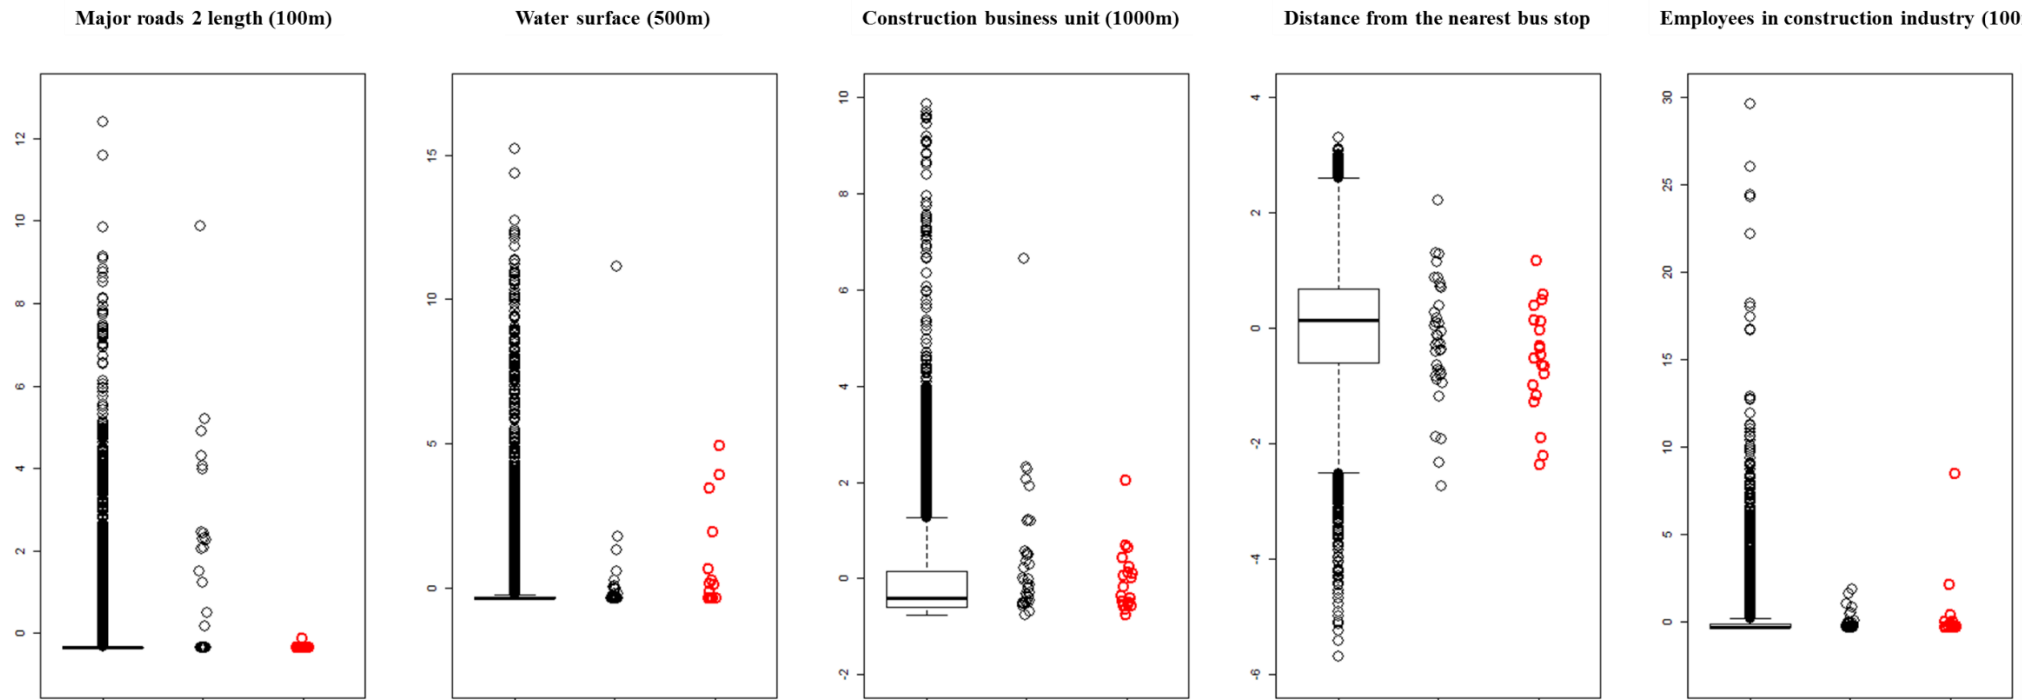

**Figure S5.** Distributions of five scaled geographic variables across subject locations (left), current locations (middle), and new sites (right) selected from candidate locations by using the monitoring design for PM<sub>2.5</sub>.

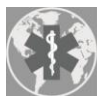

PM<sub>2.5</sub> (µg/m<sup>3</sup>)

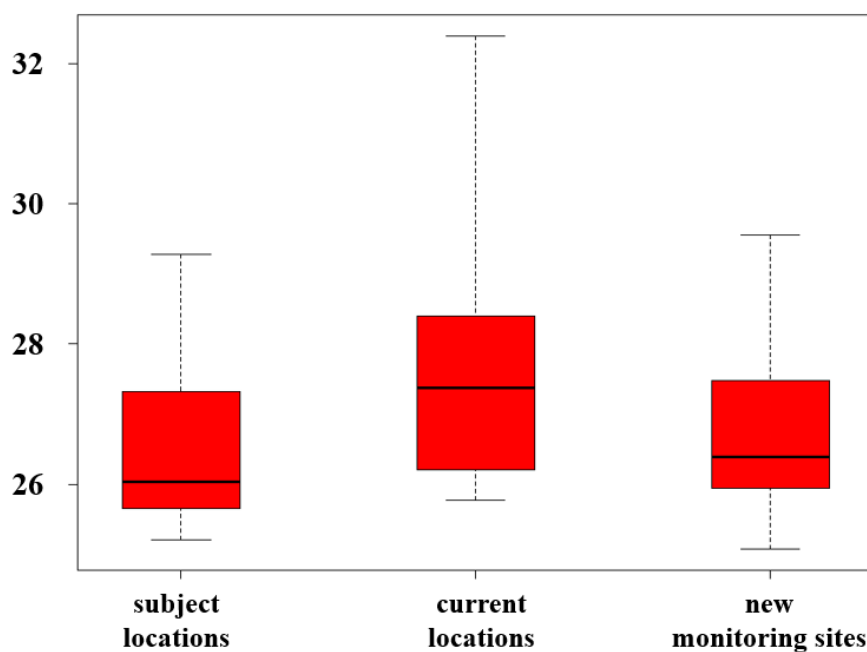

**Figure S6.** Variability of predicted PM<sub>2.5</sub> across subject locations (left), current locations (middle), and new sites (right).

Observed NO<sub>2</sub> (ppb)

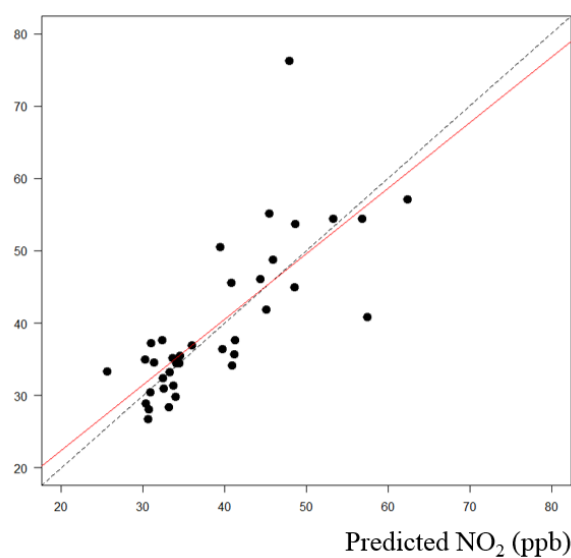

**Figure S7.** Scatter plot of observed and cross-validation predicted annual average concentrations of NO<sub>2</sub> across 37 regulatory monitoring sites during 2010 in Seoul, Korea (leave-one-out cross-validation R<sup>2</sup> 0.58).

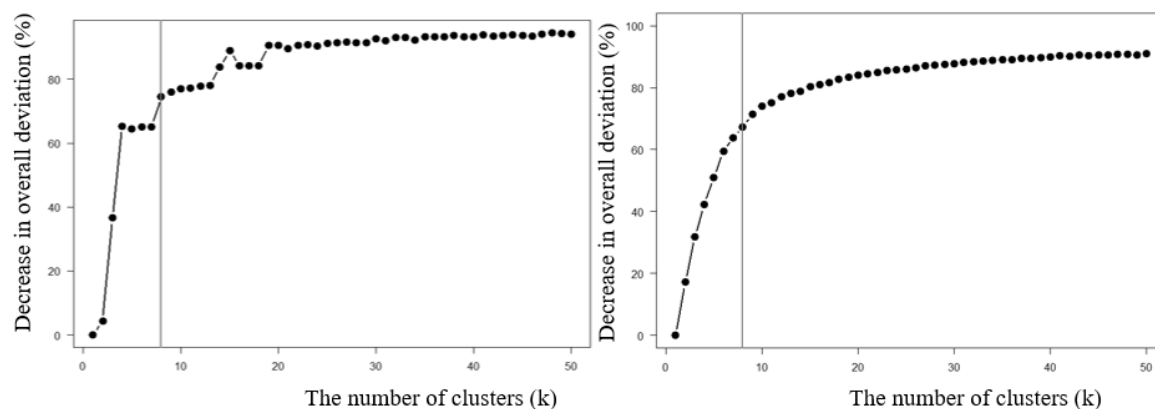

**Figure S8.** Decrease in overall deviation (DiD) based on predicted NO<sub>2</sub> concentration (left) and five geographic variables (right) against the numbers of clusters (k) (vertical lines indicating nine clusters).

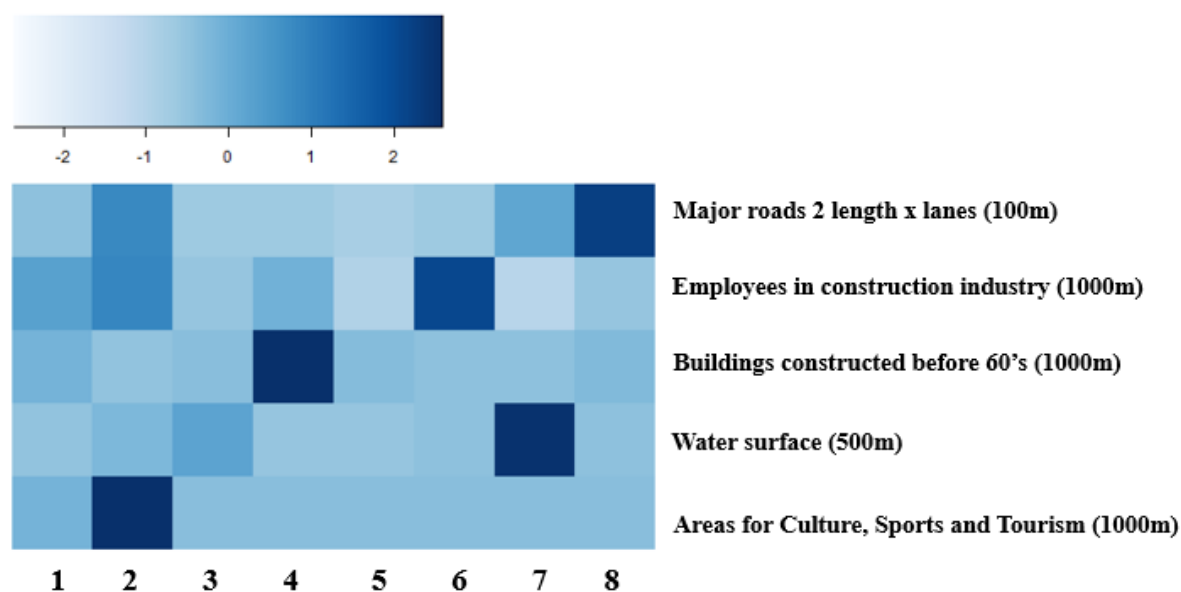

**Figure S9.** Heatmap of the five geographic variables at current, subject, and candidate locations across eight clusters for NO<sub>2</sub>.



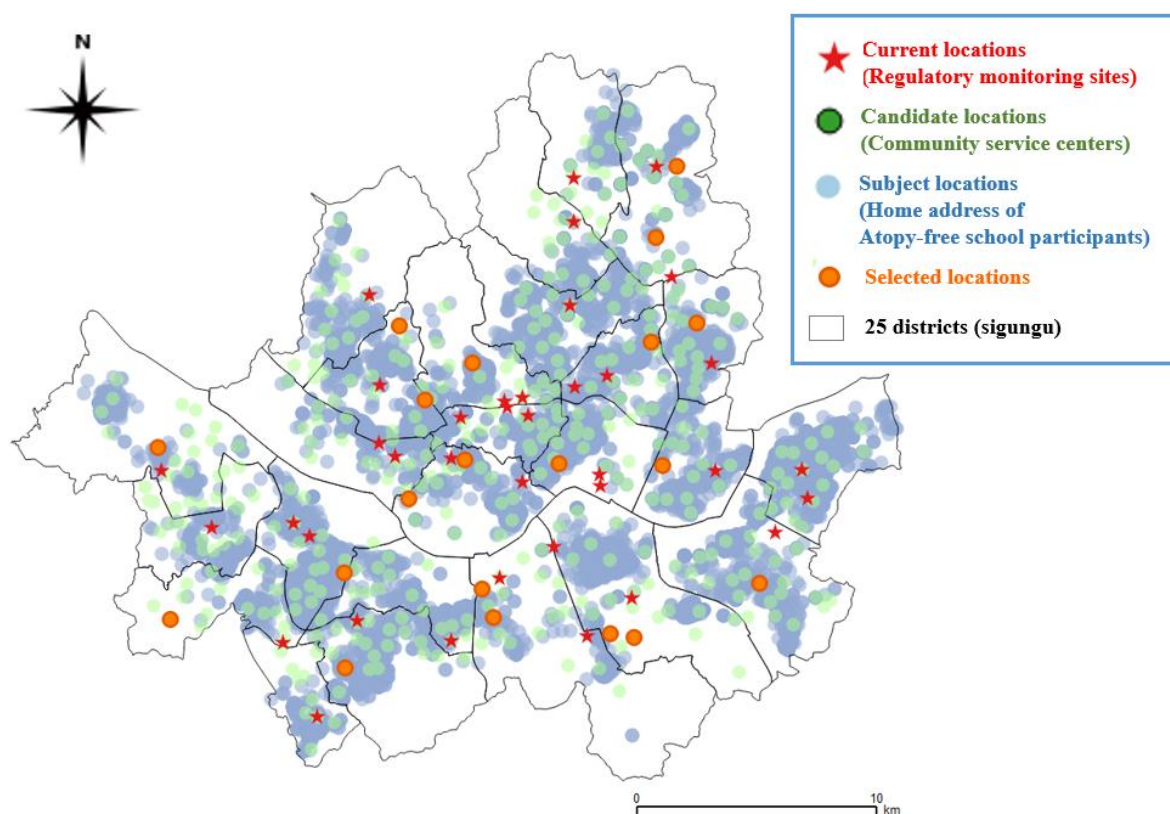

**Figure S10.** Map of 20 selected new monitoring sites for NO<sub>2</sub> along with current, candidate, and subject locations in Seoul, Korea.

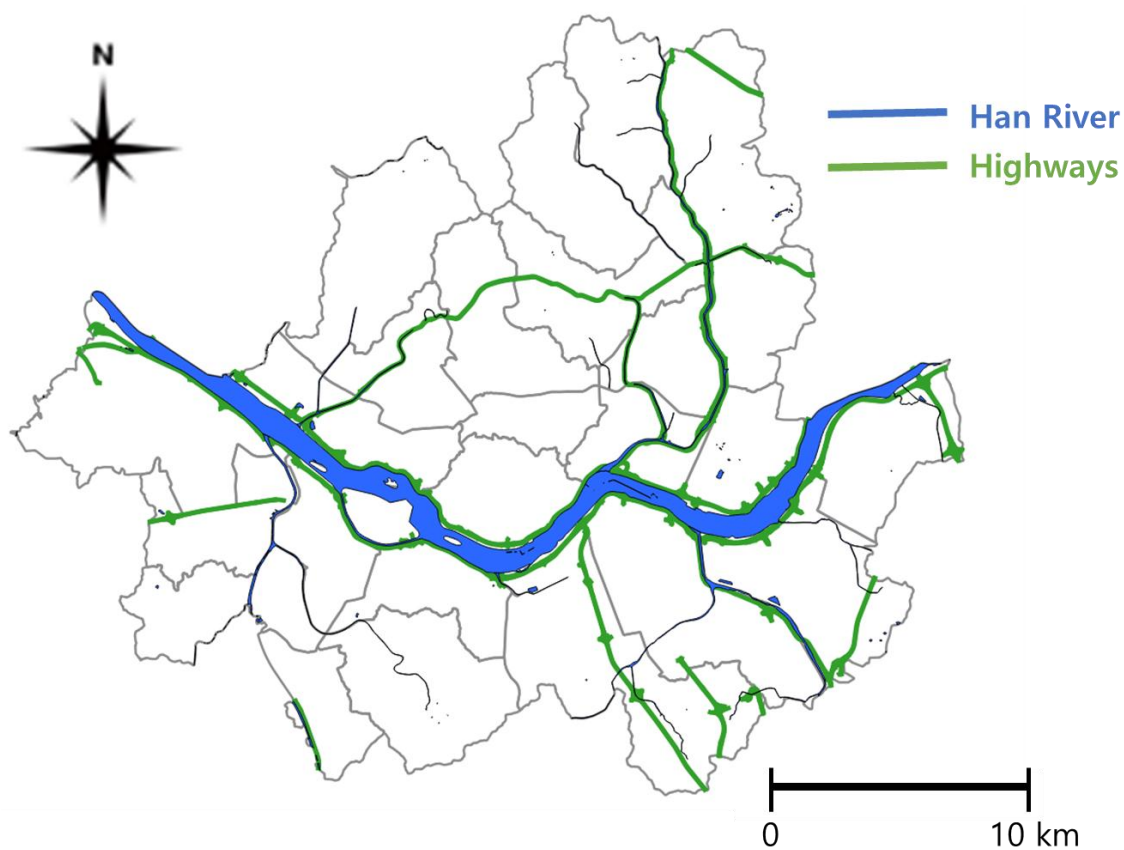

**Figure S11.** Map of Han River and metropolitan and national highways in Seoul.

© 2017 by the authors; licensee MDPI, Basel, Switzerland. This article is an open access article distributed under the terms and conditions of the Creative Commons by Attribution (CC-BY) license (<http://creativecommons.org/licenses/by/4.0/>).

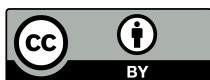

Supplement: s1 [file s1]
